# Supplementary material
Source: Research Square preprint supplement (doi:10.21203/rs.3.rs-8740007/v1)
Supplement: Supplementary file 1 [file 1b78d9709a5d491cacf54bb4.docx]

**Appendix A. Facilitator Protocol**

**1. Intro & Consent (3 min)**

*“Hi [Participant Name], I’m [Moderator name], thanks again for joining today’s session. I’ll walk you through what we’ll do, then we’ll get started.*

*This session is part of a study on how creative professionals are using or adapting to AI tools in their workflow. Everything will be anonymized and used for research purposes only. You’re free to pause or withdraw at any time.*

*Can I confirm that you’ve signed and returned the consent form? And are you okay with us recording this session for transcription and analysis?”*

>>> Confirm verbal consent again

>>> Turn on recording (video + screen)

>>> Start notetaking (in shared doc)

>>> start recording in Zoom + transcript active

**2. Pre-task Survey (2 min)**

**If not completed:**

*“Before we begin the task, I’ll send over a quick survey to capture some background info. It should take less than 5 minutes. Let me know once you’ve completed it. Or you can share your screen.”*

>>> Send Pre-task Survey (Qualtrics) link via Zoom chat

>>> Tell participant their participant ID, e.g. “P11” + Paste in Chat

**3. Task Briefing (5 min)**

**For AI workflow:**

“Do you have your own ChatGPT Plus account? If not, I can provide a shared one.”

>>> send ChatGPT credentials in the Zoom chat

**3.1 Introduce the Scenario and Task**

**(a) For Architects**

*“Let’s begin the design task. Your challenge today is to design a workplace concept that enhances physical and mental wellbeing in remote or hybrid work settings.*

*Imagine you’re designing for professionals working in flexible or isolated environments who face challenges like stress, disconnection, and lack of work-life boundaries.*

*Your task is to create a modular, easily deployable workplace concept that can promote focus, social connection, or mental restoration, adaptable to various contexts and minimal infrastructure.*

*You’ll have about 30 minutes total. The goal isn’t to produce a finished design, but to explore ideas, iterate, and show how you think. Feel free to sketch, make notes, or use AI tools if applicable.”*

**(b) For Designers**

*“Your challenge today is to design a digital experience concept, like an app or web interface, that supports mental and physical wellbeing for people working remotely or in hybrid settings.*

*Despite flexibility, many people still experience fatigue, disconnection, and stress. Your solution might aim to improve emotional balance, focus, a sense of presence, or social interaction.*

*You’ll have 30 minutes, and you can sketch an interface, diagram a user flow, or generate visuals using AI if applicable. The goal is to externalize your creative process, not to make something polished.”*

>>> paste instructions in the chat for participant’s reference

**3.2 Brief Participants on Structure and Output**

*“You’ll go through* ***three phases*** *during the task. These are just prompts, move at your own pace.*

- ***Framing the Challenge****: identify the core issue your design addresses (e.g., isolation, fatigue, focus).*
- ***Ideation & Layout / Features****: develop the structure, function, or layout of your concept.*
- ***Experiential / Interaction Design****: explore how users will interact with it and how it supports wellbeing.*

*Please* ***think aloud*** *as much as you feel comfortable – it helps us understand your process. I’ll mostly stay quiet but will check in occasionally, especially if you pause or run short on time.”*

>>> paste instructions in the chat for participant’s reference

**3.3. Time Based Reminder During Design Task (30min)**

**After 10 min:** *“You can move on to the next stage whenever you're ready — maybe start thinking about how your concept takes shape or functions.”*

**After 10 min:** *“You're halfway through, feel free to start exploring interaction or experiential elements now.”*

**After 10 min:** *“We’re in the final stretch. Use this time to summarize or sketch the key parts of your idea.”*

**3.4 At the End of the Task**

*“Could you take a screenshot or a photo of anything you sketched, wrote, or generated so we can include it with your session notes? You can also share after the session.”***4. Post survey (5 min)**

*“Thanks for walking through the task. Now I’ll send you in the Zoom chat a quick post-task survey to capture your reflections. Please think aloud as much as you feel comfortable. It will help us understand why you choose certain answers.”*

*>>> send Post-task Survey (Qualtrics): A*[*I*](https://qualtricsxm5dqjcf5nv.qualtrics.com/jfe/form/SV_efkPKGGE3JHDQO2) *or Traditional link via Zoom chat*

**5. Semi-Structured Interview (10 min)**

*“Last step: I now have a few follow-up questions about your process and how it felt to use these tools.”*

**(a) For participants using GenAI during the task**

**Ease and Flow of Ideation**

- Were there moments where you felt particularly inspired or stuck during the task?
- Did using GenAI affect your creative momentum?

**Tool Use and Interaction**

- How would you describe your interaction with the AI tools (e.g., ChatGPT, Midjourney)?
- Were there any challenges or surprises using these tools?
- Did the tools support ideation, decision-making, or execution most?

**Creativity and Originality**

- Do you feel the idea you created is something you could have come up with on your own?
- Were there moments when the AI output felt particularly creative or unexpected?

**Authorship and Control**

- How much of your final concept feels like it came from you, versus the tool?
- Did you feel in control, or did the tool guide or constrain your direction?

**Future Use and Integration**

- Would you consider using GenAI tools in real design projects?
- What features or improvements would make the tools more helpful to you?

**Output Reflection**

- Looking at your final output, which parts feel most authored by you?
- If you had more time, how would you continue to iterate on this idea using (or not using) GenAI?

**(b) For participants not using GenAI during the task**

**Ease and Flow of Ideation**

- Did you feel a sense of flow or challenge during the task?
- Were there moments when the process felt especially productive or difficult?

**Tool Use and Interaction**

- What tools or methods did you use for the task?
- Did any part of your typical workflow feel enhanced or limited?

**Creativity and Originality**

- How do you feel about the originality of the final idea?
- Is this something you’d typically come up with, or did the challenge push you in new directions?

**Authorship and Confidence**

- Do you feel the final output reflects your personal design voice?
- Were there points where you struggled to express what you imagined?

**Reflection on GenAI Tools**

- **If** you had access to GenAI tools (e.g., image or text generators), how do you think they would have changed your process?
- Would you be open to experimenting with such tools in the future?

**Output Reflection**

- Which elements of your design are you most connected to?
- What would your next steps be if you had more time?

>>> Make a copy of the interview notes doc, rename to “Participant ID” + “session condition, e.g. GenAI + Designer”, and note down the question answers.

**6. Wrap-up & Closing & Asking for contacts (5 min)**

*“That wraps up our session! Thank you for your time and insights. this was really valuable. If you haven’t already, please remember to send us any sketches or screenshots from your session.*

*[If applicable] “Also, make sure you log out of any AI tools you used with our shared credentials.*

*Let us know if you have any questions. We'll keep you posted about study outcomes if you're interested!”*

**After the session:**

>>> *Go to Zoom web portal and download all documents (*recording, transcript, chat history, etc*)*

*>>>* upload Zoom files, moderator’s interview notesand any artifacts (sketches, ChatGPT history…) participant developed during the study to shared Drive folder

**Appendix B. Themes and their corresponding quotes and codes**

| **Theme** | **Quotes** | **Codes** |
| --- | --- | --- |
| Agency & authorship | “If you’re doing since the beginning, then it’s not your work. If you’re doing at the middle of the process or just to get some help on the regulatory part of it, the technical aspects, (e.g.) I forgot the specification of the aluminum or whatever, it’s helpful.” (P19)  “The human touch in the creativity part is essential, while the technical aspect, I believe it’s just a matter of time that something better than us at doing it will replace it.”(P19) | agency, impacts of AI tooling on perceived agency,  ownership_authorship,  creativity, creative process, comparative dynamics,  effects of AI on perceived creativity,  creativity of AI tooling |
| Client Dynamics & Disclosure | “I would be very open about AI… some of these images are generated from AI, so if they look a little bit funny, then that’s why, but it’s to give the idea. So I would be very open about it.” (P7)  “...if we present to our clients, our work and it’s made by AI, they will skip that idea, that suggestion or like whatever. And they prefer something that has been thought by an architect, but the funny thing is that we don’t, of course, tell them that the thing that they did not like was made by an AI.” (P19) | clients,  client disclosures, client perception of AI,  prototyping. |
| Cognitive Load | “...you need to check. I think what is coming out of the GenAI.” (P1)  “(output) that Midjourney does, and it’s that real thing of, like, it gives me the better images, but it’s the harder platform to understand and the harder one to kind of get to grips with… you can only spend a certain amount of time doing that, and then you’ve got to develop the idea yourself.” (P7)  “I believe that is fundamental to people in my field to start using AI, but to get some help, not for recreate your work or for work less because if you use AI, at least in my field, to get some help, you are not doing less work.” (P19) | cognitive_load,  new types of cognitive load,  general commentary. |
| Workflow and efficiencies | “Using ChatGPT to help me justify some design options.” (P13)  “With Figma …wireframe quicker; plugins for accessibility checks.” (P2)  “Consulting the AI tool helped me to save time.” (P11)  “It gives me the color palette that I could use already.” (P7)  “I’d like to have a prompt, some prompts just to get me started, so I’ll ask it some questions.” (P13)  “First draw by hand, and then then I use the AI”(P6)  …”none of these would be the exact thing that I would want, but seeing something, AI does is much faster…I think it just speeds it up. Typical of your design style.” (P7) | workflow speed, technology,  workflow, validation,  Ideation,  ownership_authorship,  manipulation,  creative process, creativity, general process,  current uses,  repetitive tasks,  general commentary. |
| Ideation Quality & Diversity | “I just use it to get more ideas (ChatGPT) … Sometimes I feel it’s, um, more than I expected, more than my expectation.” (P3)  “...even ChatGPT is great, because you can check if something that you want to build is legal, so that it’s regulation and yeah, to make sure that you are satisfying the requirements.” (P19) | GenAI helpful for ideation quality,  GenAI generates poor ideas,  effects of AI on perceived creativity,  creativity of AI tooling,  time,  research. |
| Tool Limitations & Quality Issues | “When I would not read something, and then I will discover that he(ChatGPT) changed the way that it’s supposed to be, for example.” (P1)  “It’s not smart, it’s not intelligent.” (P9)  “My problem with ChatGPT and Dolly and things like that is they produce cool images, but I can’t put that in a deck, I can’t put that in a presentation, because it’s not really styled in the way that we style things at Autodesk.” (P10)  “I’m not an expert in nothing like that with AI1, but I know it will help me a lot if I know how to work with that”. (P13) | AI output quality,  reflecting design style,  potential use cases, design considerations,  literacy,  inputs,  interaction with GenAI,  education,  customization,  current uses,  current limitations. |
| Trust in GenAI | “Since they have hallucinations, like, or just see if they have hallucinations, so I cannot choose 100%” (referring to AI output)  “I feel like you should use them for an open mind, just as a tool to explore” (P16)  “I can, uh, like, recall when, for example, my students are using the ChatGPT4 mockups for, uh, designing. It’s always easy to see that this is made by ChatGPT.” (P1)  “There’s always something with AI where, you know, you’ve got to check all the finer details that you haven’t got” (P2)  “I do kind of worry for the future that it’s, it’s gonna allow everybody to do everything, so we’re going to have some very strange kind of experiences designed and created there that aren’t really centered around people”(P2) | GenAI trust,  GenAI helpful for ideation quality,  GenAI generates poor ideas,  ownership_authorship. |
| GenAI as a Negotiated Collaborator | To create some concept which is like mine, that I feel it’s something that I just came up today, and I’m excited about it…and then I can work together with some Gen AI tools to improve it, to change it.” (P1)  “If I want them to do an activity, I can get AI to give me examples of… good examples that are specific for the things that we’re looking at, to get them started and get them moving…with the research side of it, there’s a lot of articles on there already, and then I’ll be able to filter through them, so if I don’t really know what I want to have a look at yet, I could go for some filters, look for some keywords…And it offers suggestions as well, which I find quite interesting, because it’s that, have you thought of this? Have you thought of that?...” (P2) | potential use cases,  effects of AI on ideation speed,  GenAI as a collaborator |

*Table 1: Themes, respective supporting quotes, and related codes.*
